# Supplementary material
Source: publisher figshare collection journal article supplement (https://frontiersin.figshare.com/ndownloader/files/20773728)
Supplement: Supplementary file [file 20773728]

## Supplementary data 1

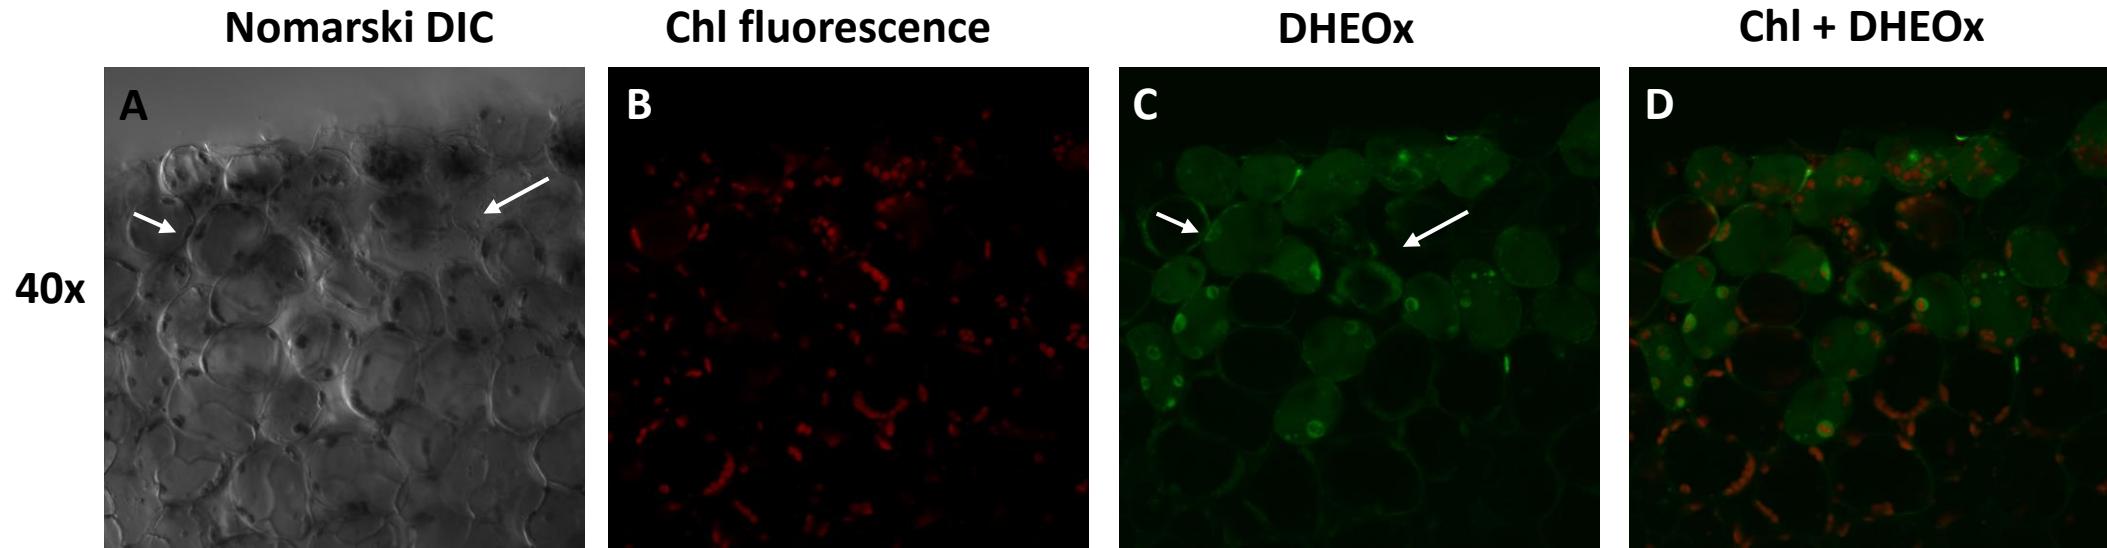

**Supplementary data 1:** Superoxide anion radical imaging in cells of WT Arabidopsis leaves detected by confocal laser scanning microscope. The panels (from left to right) represents the Nomarski DIC; chl fluorescence; DHEox fluorescence and combined (chl fluo + DHEox) channel following 30 min of incubation in DHE [250  $\mu$ M] in the presence of 0.01% DMSO. The arrows indicate the sites of mechanical injury ~~measured at a magnification of 40x~~. More cell layers are can be seen to be impacted (marked by arrows) in comparison to Fig. 1II. The fluorescence signal was measured with an excitation ( $\lambda_{ex}$ ) and emission ( $\lambda_{em}$ ) wavelengths of 488 nm and 505-605nm respectively.
